# Supplementary material for: Premorbid physical activity is modestly associated with gait independence after a stroke: an exploratory study
Source: Springer Nature journal article supplement (doi:10.1186/s11556-018-0208-8), 2018-12-01
Supplement: MOESM1 [file 16359028]

Additional file

Questionnaire given to participants (converted to English)

---

Please check all daily ( $\geq 1$  hr / week) activities and exercises you have done shortly (approximately within 1 month) before hospital admission.

- |                                                          |                                                                                    |
|----------------------------------------------------------|------------------------------------------------------------------------------------|
| <input type="checkbox"/> watching TV                     | <input type="checkbox"/> walking (moderate)                                        |
| <input type="checkbox"/> listening to music              | <input type="checkbox"/> cycling                                                   |
| <input type="checkbox"/> reading                         | <input type="checkbox"/> aquatic exercise                                          |
| <input type="checkbox"/> desk work                       | <input type="checkbox"/> walking (intense)                                         |
| <input type="checkbox"/> handcrafting                    | <input type="checkbox"/> playing golf (on foot)                                    |
| <input type="checkbox"/> cooking                         | <input type="checkbox"/> mowing, removing snow                                     |
| <input type="checkbox"/> washing clothes using a machine | <input type="checkbox"/> dancing                                                   |
| <input type="checkbox"/> pressing clothes                | <input type="checkbox"/> playing baseball, soccer                                  |
| <input type="checkbox"/> child care                      | <input type="checkbox"/> moving furniture                                          |
| <input type="checkbox"/> walking with a carriage         | <input type="checkbox"/> running, swimming, mountain-climbing                      |
| <input type="checkbox"/> yoga                            | <input type="checkbox"/> climbing stairs                                           |
| <input type="checkbox"/> washing dishes                  | <input type="checkbox"/> farming, stockbreeding, fishing                           |
| <input type="checkbox"/> housecleaning (light)           | <input type="checkbox"/> others (please list other activities and exercises here): |
| <input type="checkbox"/> driving a car or scooter        |                                                                                    |
| <input type="checkbox"/> stretching                      |                                                                                    |
| <input type="checkbox"/> playing a musical instrument    |                                                                                    |
| <input type="checkbox"/> walking (slowly)                |                                                                                    |
| <input type="checkbox"/> bowling, playing volleyball     |                                                                                    |
| <input type="checkbox"/> weight-training (light)         |                                                                                    |
| <input type="checkbox"/> walking a dog                   |                                                                                    |
| <input type="checkbox"/> carpentry                       |                                                                                    |
| <input type="checkbox"/> housecleaning (moderate)        |                                                                                    |
| <input type="checkbox"/> packing                         |                                                                                    |
| <input type="checkbox"/> exercising at home              |                                                                                    |
| <input type="checkbox"/> playing golf (using a cart)     |                                                                                    |
