# Supplementary material for: Premorbid physical activity is modestly associated with gait independence after a stroke: an exploratory study
Source: Springer Nature journal article supplement (doi:10.1186/s11556-018-0208-8), 2018-12-01
Supplement: MOESM2 [file 16359028]

Supplementary Table 1: Details of the participants

|                     | WA group   | NWA group  |
|---------------------|------------|------------|
| Number              | 97 (100 %) | 33 (100 %) |
| Age (years old)     |            |            |
| < 64                | 24 (24.7)  | 0 (0)      |
| 64 - 69             | 26 (26.8)  | 4 (12.1)   |
| 70 - 79             | 33 (34.0)  | 12 (36.4)  |
| 80 - 89             | 14 (14.4)  | 16 (48.5)  |
| 90 <                | 0 (0)      | 1 (3.0)    |
| Paresis             |            |            |
| BRS 1 – 2           | 0 (0)      | 6 (18.2)   |
| BRS 3 – 4           | 6 (6.2)    | 4 (12.1)   |
| BRS 5 – 6           | 91 (93.8)  | 23 (69.7)  |
| Sensory disturbance |            |            |
| none or slight      | 90 (92.8)  | 26 (78.8)  |
| overt               | 4 (4.1)    | 5 (15.2)   |
| unknown             | 3 (3.1)    | 2 (6.1)    |
| Dementia            |            |            |
| class 0             | 79 (81.4)  | 15 (45.5)  |
| class 1             | 9 (9.3)    | 4 (12.1)   |
| class 2             | 6 (6.2)    | 4 (12.1)   |
| class 3             | 3 (3.1)    | 3 (9.1)    |
| class 4             | 0 (0)      | 6 (18.2)   |
| class M             | 0 (0)      | 1 (3.0)    |

|                     |           |           |
|---------------------|-----------|-----------|
| CI                  |           |           |
| 0                   | 6 (6.2)   | 0 (0)     |
| 1                   | 19 (19.6) | 4 (12.1)  |
| 2                   | 34 (35.1) | 10 (30.3) |
| 3                   | 24 (24.7) | 11(33.3)  |
| 4                   | 12 (12.4) | 6 (18.2)  |
| 5                   | 1 (1.0)   | 0 (0)     |
| 6                   | 1 (1.0)   | 2 (6.1)   |
| Premorbid PA (METs) |           |           |
| 1                   | 2 (2.1)   | 2 (6.1)   |
| 2                   | 6 (6.2)   | 4 (12.1)  |
| 3                   | 7 (7.2)   | 8 (24.2)  |
| 4                   | 9 (9.3)   | 1 (3.0)   |
| 5                   | 3 (3.1)   | 2 (6.1)   |
| 6                   | 0 (0)     | 1 (3.0)   |
| 7                   | 1 (1.0)   | 0 (0)     |
| 8                   | 69 (71.1) | 15 (45.5) |

WA: walk alone; NWA: not walk alone; MET: metabolic equivalent; CI: comorbidity index (see text)

Data are shown separately according to gait independence.
