# Supplementary material for: Premorbid physical activity is modestly associated with gait independence after a stroke: an exploratory study
Source: Springer Nature journal article supplement (doi:10.1186/s11556-018-0208-8), 2018-12-01
Supplement: MOESM3 [file 16359028]

Supplementary Table 2: Activities asked in the questionnaire and the number of patients who indicated for each activity

| Activity                      | Approximate METs | WA (%)<br>(N = 97) | NWA (%)<br>(N = 33) | <i>p</i> - value |
|-------------------------------|------------------|--------------------|---------------------|------------------|
| Watching television           | 1                | 87 (89.7)          | 29 (87.9)           | > 0.9999         |
| Listening to music            | 1                | 31 (32.0)          | 10 (30.3)           | > 0.9999         |
| Reading                       | 1.3              | 47 (48.5)          | 12 (36.4)           | 0.3161           |
| Desk work                     | 1.5-1.8          | 34 (35.1)          | 6 (18.2)            | 0.1106           |
| Hand craft                    | 1.5-1.8          | 6 (6.2)            | 2 (6.1)             | > 0.9999         |
| Cooking                       | 2                | 47 (48.5)          | 10 (30.3)           | 0.1070           |
| Washing clothes using machine | 2                | 51 (52.6)          | 10 (30.3)           | 0.0441           |
| Pressing clothes              | 2.3              | 17 (17.5)          | 2 (6.1)             | 0.1851           |
| Child care                    | 2.5              | 10 (10.3)          | 1 (3.0)             | 0.3494           |
| Walking with a carriage       | 2.5              | 3 (3.1)            | 0 (0)               | 0.7256           |
| Yoga                          | 2.5              | 3 (3.1)            | 0 (0)               | 0.7256           |
| Washing dishes                | 2.5              | 51 (52.6)          | 14 (42.4)           | 0.4202           |
| Housecleaning (light)         | 2.5              | 55 (56.7)          | 17 (51.5)           | 0.7528           |
| Driving a car or scooter      | 2.5              | 59 (60.8)          | 9 (27.3)            | 0.0017           |
| Stretching                    | 2.5              | 11 (11.3)          | 3 (9.1)             | 0.9721           |
| Playing a musical instrument  | 3                | 1 (1.0)            | 0 (0)               | > 0.9999         |
| Walking (slowly)              | 3                | 54 (55.7)          | 14 (42.4)           | 0.2652           |
| Bowling, playing volley ball  | 3                | 2 (2.1)            | 0 (0)               | 0.9900           |
| Weight training (light)       | 3                | 4 (4.1)            | 0 (0)               | 0.5476           |
| Walking a dog                 | 3                | 7 (7.2)            | 1 (3.0)             | 0.6563           |
| Carpentry                     | 3-3.5            | 10 (10.3)          | 3 (9.1)             | > 0.9999         |
| Housecleaning (moderate)      | 3.5              | 34 (35.1)          | 6 (18.2)            | 0.1106           |
| Packing                       | 3.5              | 5 (5.2)            | 1 (3.0)             | 0.9823           |
| Exercising at home            | 3.5              | 24 (24.7)          | 8 (24.2)            | > 0.9999         |
| Playing golf (using a cart)   | 3.5              | 6 (6.2)            | 2 (6.1)             | > 0.9999         |
| Walking (moderate)            | 3.8              | 42 (43.3)          | 13 (39.4)           | 0.8507           |

|                                         |         |           |           |          |
|-----------------------------------------|---------|-----------|-----------|----------|
| Cycling                                 | 4       | 27 (27.8) | 6 (18.2)  | 0.3848   |
| Aquatic exercise                        | 4       | 2 (2.1)   | 0 (0)     | 0.9900   |
| Walking (intense)                       | 4-5     | 11 (11.3) | 2 (6.1)   | 0.5910   |
| Playing golf (on foot)                  | 4.5     | 1 (1.0)   | 0 (0)     | > 0.9999 |
| Mowing, removing snow                   | 4.5-6   | 36 (37.1) | 5 (15.2)  | 0.0333   |
| Dancing                                 | 4.8 – 6 | 5 (5.2)   | 0 (0)     | 0.4202   |
| Playing baseball, soccer                | 5 -7    | 1 (1.0)   | 0 (0)     | > 0.9999 |
| Moving furniture                        | 6       | 6 (6.2)   | 1 (3.0)   | 0.8047   |
| Running, swimming,<br>mountain climbing | 6-11    | 2 (2.1)   | 0 (0)     | 0.9900   |
| Climbing stairs                         | 8       | 57 (58.8) | 15 (45.5) | 0.2603   |
| Farming, stock breeding,<br>fishing     | 8       | 20 (20.6) | 4 (12.1)  | 0.4082   |

WA: patients who regained independent gait. NWA: patients who did not regain independent gait. METs: metabolic equivalents. Chi-squared tests were performed for each activity and for gait independence.
