# Supplementary material for: Premorbid physical activity is modestly associated with gait independence after a stroke: an exploratory study
Source: Springer Nature journal article supplement (doi:10.1186/s11556-018-0208-8), 2018-12-01
Supplement: MOESM4 [file 16359028]

Supplementary Table 3: Logistic regression analyses of maximal daily activity and walk independence among the participants with a history of cerebrovascular disease

|                               | <i>p</i> - value | odds ratio | 95% C.I.       |
|-------------------------------|------------------|------------|----------------|
| <b>Maximal daily activity</b> |                  |            |                |
| ≥ 2 METs                      | 0.9780           | 222818.423 | 0.000 –        |
| ≥ 3 METs                      | 0.3443           | 2.429      | 0.386 – 15.277 |
| ≥ 4 METs                      | 0.0332           | 5.333      | 1.142 – 24.903 |
| ≥ 5 METs                      | 0.0754           | 3.500      | 0.880 – 13.927 |
| ≥ 6 METs                      | 0.0371           | 4.400      | 1.092 – 17.722 |
| ≥ 8 METs                      | 0.0170           | 5.600      | 1.360 – 23.062 |

METs: metabolic equivalents; C.I.: confidence interval. No participants indicated 7 METs.
